# Supplementary material for: GSPE Pre-Treatment Exerts Long-Lasting Preventive Effects against Aging-Induced Changes in the Colonic Enterohormone Profile of Female Rats
Source: MDPI journal article supplement (doi:10.3390/ijms24097807), 2023-04-25
Supplement: s1 [file s1]

**Table S1. Supplementary material.** Intestinal morphometric parameters at sacrifice.

|                              | YOUNG                  | 21-MONTHS          | GSPE PRE               |
|------------------------------|------------------------|--------------------|------------------------|
| Small intestine (cm)         | 99.7 ± 1.7*            | <b>106.9 ± 2.1</b> | 108.3 ± 1.4            |
| Small intestine (g)          | 5.9 ± 0.1*             | <b>7.0 ± 0.2</b>   | 6.5 ± 0.2 <sup>#</sup> |
| Ratio small intestine/BW (%) | 2.3 ± 0.1*             | <b>2.0 ± 0.1</b>   | 1.8 ± 0.1              |
| Colon (cm)                   | 1.2 ± 0.1*             | <b>1.5 ± 0.1</b>   | 1.5 ± 0.1              |
| Colon (g)                    | 17.9 ± 0.5*            | <b>20.1 ± 0.6</b>  | 20.5 ± 0.5             |
| Ration colon/BW (%)          | 0.5 ± 0.0              | <b>0.4 ± 0.0</b>   | 0.4 ± 0.0              |
| Empty cecum (g)              | 0.7 ± 0.0 <sup>#</sup> | <b>0.9 ± 0.1</b>   | 0.9 ± 0.1              |
| Cecal material (g)           | 1.5 ± 0.2              | <b>1.7 ± 0.2</b>   | 1.8 ± 0.4              |

BW, body weight. \* Indicates  $p \leq 0.05$ . <sup>#</sup> Indicates  $p \leq 0.1$  vs 21-MONTHS by Student's T test.
